# Supplementary material
Source: PubMed Central journal article supplement (PMC3713421)

## **SUPPLEMENTARY METHODS**

### **Human primary samples and cell lines**

Non-tumoral fresh human tonsils were obtained with the approval of the Institutional Review Boards in accordance with the Declaration of Helsinki. Tissues were either fixed and embedded in paraffin, or submitted to magnetic-based separation of IgD<sup>+</sup>, CD27<sup>+</sup> and CD71<sup>+</sup> cells (Miltenyi Biotec). The purity of the isolated cells was higher than 90% as measured by FACS. The human GC-like DLBCL cell line OCI-Ly1 was grown in medium containing 90% Iscove's medium (Cellgro), 10% FBS (Gemini Bio-Products) and 1% penicillin/streptomycin (Gibco).

### **Immunohistochemistry and Immunofluorescence**

Slides were deparaffinized and antigen retrieved in 1mM EDTA pH 8.0 using steaming for 30 min. Indirect IHC was performed and developed by DAB color substrates (Vector Laboratories) as previously described<sup>10</sup>. Primary antibodies against CD3, CD79 $\alpha$ , CD68, CD21, IgD, FOXP1, peanut agglutinin (PNA), and BCL6 are listed in Table S3. Slides were viewed with a light microscope (AxioSkop2; Carl Zeiss Microimaging, Inc.) using 10X/0.50, 20X/0.50, 40X/0.90 or 100X/1.30 Plan Neofluar objective lenses. Images were taken using a color camera (AxioCam, Carl Zeiss) and processed using Axiovision software (Carl Zeiss).

### **Western blot**

Cells were lysed in RIPA buffer. Equal amounts of total protein were separated by SDS-PAGE and transferred to a nitrocellulose membrane (Amersham Biosciences). Primary antibodies against FOXP1, BCL6 and actin are listed in Table S3. The signal from HRP-conjugated secondary antibodies was developed using Lumi-Light PLUS Western Blotting Substrate (Roche).

### **Array-based chromatin immunoprecipitation (ChIP-on-chip)**

A total of  $50 \times 10^6$  OCI-Ly1 cells were cross-linked with 1% formaldehyde. After sonication, immunoprecipitations were performed using 10 $\mu$ g Rabbit polyclonal antibody against FOXP1 (Abcam ab16645) or normal rabbit IgG antibody (Sigma–Aldrich). After validation of the enrichment by Q-ChIP, FOXP1 ChIP products and their respective input genomic fragments were amplified by ligation-mediated PCR. The products were cohybridized with the respective input samples to NimbleGen promoter arrays representing 1.5 kb of promoter sequence from 24,275 genes with 10 oligonucleotides each (human genome v. 35, May 2004) according to the manufacturer’s protocol (NimbleGen Systems). Three replicates were performed (GEO Series GSE44243).

### **Computational analyses**

Following our previously described strategy<sup>30,31</sup>, we assayed moving averages of log-ratio of any 3 neighboring probes, calculated a background control as the random permutation of the log ratios of all probes, and determined a maximum value for each gene promoter. The cut-off for each array was established as higher than 99th percentile of the 24175 log-ratio values generated from random permutation probes. A locus with maximum moving average above cut-offs in two replicates was considered a potential binding site. Since this high stringency overlapping approach produces higher false negative rates, we also computed the correlations among peaks between the replicates as a way to rescue promoters that did not pass the cut-off in one replicate. High correlation between the signals of promoter demonstrates that the probes in each promoter follow a similar pattern, indicating the presence of an underestimated peak. Therefore, we calculated the Pearson correlation coefficient of the probes signal of the promoter between replicates, and promoters with a correlation higher than 0.8 were rescued and

included in our final set of FOXP1 targets. Ingenuity Pathway Analysis (IPA) determined the most significantly enriched biological functions and/or related diseases ([www.ingenuity.com](http://www.ingenuity.com)). De novo motif analysis was performed using the FIRE motif discovery program<sup>32</sup>. The over-representation of FIRE-discovered motifs in different gene sets was assessed using the hypergeometric distribution. Only motif matches with CompareACE scores  $> 0.8$  were reported (1.0 being the maximum score achievable). To investigate the expression levels in B cells of FOXP1 target genes we analyzed a large cDNA microarray-based gene expression dataset, which we published previously<sup>33</sup> (GEO Series GSE25639). Normal primary samples (Figure 2 and GSE25639<sup>33</sup>) were hybridized to Affymetrix Human Genome U133 Plus 2.0 Array, and DLBCL samples (Figure S2 and [www.broad.mit.edu/cancer/pub/dlbcl](http://www.broad.mit.edu/cancer/pub/dlbcl)<sup>42</sup>) were hybridized to Affymetrix HT\_HG-U133A/B Arrays, which contain 9 and 8 probes to detect FOXP1 transcripts, respectively. All probes contribute to determine overall FOXP1 expression in our analyses. R and Bioconductor were used for preprocessing and statistical analysis ([www.r-project.org](http://www.r-project.org)), and the Genesis software (Institute for Genomics and Bioinformatics, Graz University of Technology) was used to visualize and cluster FOXP1 target genes expression data.

### **Real time PCR analyses**

Total RNA was extracted from harvested cells using TRIzol (Invitrogen) as described in manufacturer's protocol. RNA was converted into cDNA using random hexanucleotides and M-MLV reverse transcriptase (Promega). Quantitative RT-PCR (QRT-PCR) was performed with SYBR green (Applied Biosystems) in an ABI 7900 HT real-time thermal cycler (Applied Biosystems). cDNAs were tested in replicates, and data was normalized to the *GAPDH* housekeeping gene, and presented either as  $2^{-\Delta Ct}$  or as relative to control ( $2^{-\Delta\Delta Ct}$ ). GLTs expression analyses were normalized to Ig $\beta$  levels and represented relative to those of

unstimulated WT cells. For quantitative ChIP (Q-ChIP), DNA fragments enriched by ChIP as described before were quantified in the same ABI 7900 HT real-time thermal cycler. Input DNA was used for Ct normalization. IgG isotype control and the *PRR20A* gene, which is not a FOXP1 target, were used as negative controls. All primers used in these experiments are listed in Table S3.

### **siRNA knockdown experiments**

Targeting of the 3'UTR region of *hFOXP1* (Dharmacon) with two different siRNAs: siRNA1 (5'-CAACTTAGCCAGCGCAATA-3') or siRNA2 (5'-GCCAAGGCCTTCTGACAATT-3'), was able to knock-down FOXP1 effectively 48 hours after siRNA transfection as measured by QRT-PCR. After transfections, expression profiles were normalized to untreated cells and differences were represented as fold-changes relative to the scramble control.

### **Mice**

Transgenic mice over-expressing the human *FOXP1* cDNA (NM\_032682.5) under the control of E $\mu$  enhancer and SR-alpha mouse promoter were developed through pronuclear DNA injection technology in the C57BL/6 mouse strain ([www.genoway.com](http://www.genoway.com)). The pE $\mu$ SR vector was kindly provided by Dr. Jerry Adams (WEHI, Melbourne, Australia). Mice were characterized for transgene integration by PCR and Southern blot analysis (see primers in Table S3), crossed onto the C57BL/6 genetic background and housed in specific pathogen-free animal facility. All experiments were conducted with protocols approved by the Ethical Committee of Animal Experimentation of the University of Navarra.

## **Immunizations**

Series of 2- to 8-month-old mice were immunized intraperitoneally with  $0.5 \times 10^9$  sheep red blood cells (SRBCs) (Innovative research). Generally, SRBC immunizations were performed on day 0 and day 7, and animals were sacrificed at day 14. For FACS analysis of GC B cell frequencies, animals were immunized with SRBCs only once at day 0 and then sacrificed at day 14. To study T-dependent immune responses, 2-month-old mice were immunized intraperitoneally with 100  $\mu\text{g}$  of NP<sub>(36)</sub>-CGG (NP-Chicken Gamma Globulin) (Biosearch Technologies) on day 0 and were re-challenged with the same antigen 4 weeks later. At the indicated times after immunization, mice were bled or sacrificed.

## **Flow cytometry and cell sorting**

Murine bone marrow cells, peripheral blood cells, splenocytes and thymocytes were analyzed by flow cytometry using fluorochrome-conjugated antibodies for the following surface proteins: CD4, CD8, CD21, CD23, CD25, CD45 (B220), CD95/Fas, CD117(cKit), GL-7, IgD, IgM, IgG1 (BD or Biolegend), IgG3 (Southern Biotech) and PNA (Vector Laboratories). PI was used for the exclusion of dead cells. Data were acquired on FACSCalibur flow cytometer (BD) and analyzed using FlowJo software. Sorting of murine CD19<sup>+</sup> and Gr1<sup>+</sup> splenic cells, or thymic CD3<sup>+</sup> cells was performed through magnetic sorting (MiltenyiBiotec). FACS Aria IIu sorter (BD) was used to sort  $\sim 5 \times 10^5$  murine GC splenic B cells (B220<sup>+</sup>Fas<sup>+</sup>GL7<sup>hi</sup>) and perform transcriptional analysis.

## **CSR analyses**

Blood was collected and serum separated at the indicated times for ELISA. 96-well plates were coated with NP<sub>(36)</sub>-CGG at 4°C overnight. Anti-NP Ig levels were detected with goat anti-mouse IgG1-HRP (1:4000), anti-mouse-IgG3-HRP (1:2000) and anti-mouse IgM-HRP

(1:4000) (Southern Biotech) and visualized with ABTS substrate (2,2'-Azinobis(3-ethylbenzthiazoline Sulfonic Acid) Diamonium salt; Thermo scientific). For *ex vivo* CSR, murine splenic CD19<sup>+</sup> B cells were magnetically-sorted (Miltenyi AutoMACS) and cultured in complete RPMI media supplemented with LPS 50µg/ml (for switching to IgG3) or LPS + IL-4 (50ng/ml) (for switching to IgG1). After 72 h of stimulation, IgM, IgG1 and IgG3 surface expression markers were measured by flow cytometry as previously described<sup>34</sup>. CSR in WT B cells was set to 100%. GLTs were analyzed after 48 h of stimulation by RT-PCR on RNA extracted with TRIzol (Invitrogen), using primers previously described<sup>35</sup>.

### **SHM analysis**

Total RNA was extracted with TRIzol (Invitrogen) from splenic B cells that were isolated after T cell depletion from NP-immunized mice. High-fidelity RT-PCR and nested PCR, Zero Blunt Topo cloning (Invitrogen) and sequencing of the V<sub>H</sub>186.2 region were performed as previously described<sup>36</sup>.

**SUPPLEMENTARY TABLE S1. List of FOXP1 target genes in the OCI-Ly1 cell line**

| <b>FOXP1 target genes</b> | <b>Rescued promoters</b> | <b>BCL6 target genes [Ci et al.<sup>30</sup>]</b> | <b>Cellular context for BCL6 targeting [Ci et al.<sup>30</sup>]</b> | <b>potential FOXP1 function (primary cells) [Fig. 2]</b> | <b>potential FOXP1 function (DLBCL) [Fig. S2]</b> | <b>Description</b>                                                                  |
|---------------------------|--------------------------|---------------------------------------------------|---------------------------------------------------------------------|----------------------------------------------------------|---------------------------------------------------|-------------------------------------------------------------------------------------|
| AASDHPPT                  | -                        | YES                                               | DLBCL                                                               | na                                                       | complex                                           | Amino adipate-semialdehyde dehydrogenase-phosphopantetheinyl transferase            |
| ADAM29                    | -                        | NO                                                | -                                                                   | activation                                               | na                                                | ADAM metallopeptidase domain 29                                                     |
| ADAMTSL4                  | r                        | NO                                                | -                                                                   | repression                                               | activation                                        | Thrombospondin repeat-containing protein 1                                          |
| ADRM1                     | r                        | NO                                                | -                                                                   | complex                                                  | complex                                           | Adhesion regulating molecule 1                                                      |
| AIDA                      | r                        | YES                                               | both                                                                | na                                                       | na                                                | Axin interactor, dorsalization associated                                           |
| AKT1S1                    | -                        | YES                                               | both                                                                | complex                                                  | na                                                | AKT1 substrate 1 (proline-rich)                                                     |
| ALDH16A1                  | r                        | NO                                                | -                                                                   | activation                                               | complex                                           | Aldehyde dehydrogenase 16 family, member A1                                         |
| ALDH9A1                   | r                        | YES                                               | DLBCL                                                               | activation                                               | complex                                           | aldehyde dehydrogenase 9 family, member A1                                          |
| ALG10                     | -                        | NO                                                | -                                                                   | complex                                                  | na                                                | Asparagine-linked glycosylation 10 homolog (yeast, alpha-1,2-glucosyltransferase)   |
| AMY2B                     | r                        | NO                                                | -                                                                   | activation                                               | activation                                        | Amylase, alpha 2B (pancreatic)                                                      |
| APBB1IP                   | -                        | NO                                                | -                                                                   | complex                                                  | activation                                        | Amyloid beta (A4) precursor protein-binding, family B, member 1 interacting protein |
| ATF5                      | r                        | YES                                               | DLBCL                                                               | repression                                               | complex                                           | Activating transcription factor 5                                                   |
| ATF6                      | -                        | YES                                               | both                                                                | activation                                               | activation                                        | Activating transcription factor 6                                                   |
| ATP5O                     | r                        | NO                                                | -                                                                   | repression                                               | complex                                           | ATP synthase, H <sup>+</sup> transporting, mitochondrial F1 complex, O subunit      |
| BAT4                      | -                        | NO                                                | -                                                                   | activation                                               | activation                                        | HLA-B associated transcript 4                                                       |
| BCLAF1                    | -                        | NO                                                | -                                                                   | activation                                               | complex                                           | BCL2-associated transcription factor 1                                              |
| BIK                       | -                        | NO                                                | -                                                                   | repression                                               | complex                                           | BCL2-interacting killer (apoptosis-inducing)                                        |
| BMS1P1                    | r                        | NO                                                | -                                                                   | na                                                       | na                                                | BMS1 pseudogene 1                                                                   |
| BMS1P5                    | r                        | NO                                                | -                                                                   | activation                                               | na                                                | BMS1 pseudogene 5                                                                   |
| BTG1                      | -                        | NO                                                | -                                                                   | activation                                               | complex                                           | B cell translocation gene 1, anti-proliferative                                     |
| BUB3                      | r                        | YES                                               | both                                                                | repression                                               | complex                                           | BUB3 budding uninhibited by benzimidazoles 3 homolog (yeast)                        |
| C10ORF140                 | r                        | YES                                               | DLBCL                                                               | activation                                               | na                                                | Chromosome 10 open reading frame 40                                                 |

|          |   |     |       |            |            |                                                                                   |
|----------|---|-----|-------|------------|------------|-----------------------------------------------------------------------------------|
| C19ORF56 | r | NO  | -     | repression | na         | Chromosome 19 open reading frame 56                                               |
| C1ORF58  | r | YES | both  | repression | na         | Chromosome 1 open reading frame 58                                                |
| C22ORF26 | r | NO  | -     | activation | na         | Chromosome 22 open reading frame 26                                               |
| C2ORF24  | r | YES | both  | complex    | na         | Chromosome 2 open reading frame 24                                                |
| C3ORF38  | r | YES | both  | repression | na         | Chromosome 3 open reading frame 38                                                |
| C4ORF3   | r | NO  | -     | repression | na         | Chromosome 4 open reading frame 3                                                 |
| C5ORF33  | r | YES | DLBCL | repression | na         | Chromosome 5 open reading frame 33                                                |
| C5ORF44  | r | NO  | -     | activation | na         | Chromosome 5 open reading frame 44                                                |
| C7ORF10  | r | YES | both  | na         | na         | Chromosome 7 open reading frame 10                                                |
| C7ORF11  | r | YES | both  | repression | na         | Chromosome 7 open reading frame 11                                                |
| C7ORF30  | - | NO  | -     | repression | na         | Chromosome 7 open reading frame 30                                                |
| C8ORF41  | r | YES | DLBCL | repression | na         | Chromosome 8 open reading frame 41                                                |
| C9ORF100 | r | YES | DLBCL | repression | na         | Chromosome 9 open reading frame 100                                               |
| CALM2    | - | NO  | -     | repression | na         | Calmodulin 2 (phosphorylase kinase, delta)                                        |
| CBLL1    | - | YES | both  | repression | complex    | Cbl proto-oncogene, E3 ubiquitin protein ligase-like 1                            |
| CBX3     | - | YES | both  | repression | complex    | Chromobox homolog 3 (HP1 gamma homolog, Drosophila)                               |
| CD37     | r | YES | DLBCL | activation | complex    | Cell differentiation antigen 37                                                   |
| CD55     | r | YES | both  | activation | complex    | CD55 molecule, decay accelerating factor for complement (Cromer blood group)      |
| CDC42EP5 | r | NO  | -     | repression | activation | CDC42 effector protein (Rho GTPase binding) 5                                     |
| CEP68    | r | NO  | -     | activation | complex    | Centrosomal protein 68kDa                                                         |
| CFLAR    | r | NO  | -     | activation | complex    | CASP8 and FADD-like apoptosis regulator                                           |
| CHMP2B   | r | YES | both  | activation | complex    | Chromatin modifying protein 2B                                                    |
| CHTF8    | r | NO  | -     | activation | na         | CTF8, chromosome transmission fidelity factor 8 homolog (S. cerevisiae)           |
| CIRH1A   | r | YES | both  | complex    | activation | Cirrhosis, autosomal recessive 1A (cirhin)                                        |
| CITED2   | - | YES | both  | repression | complex    | Cbp/p300-interacting transactivator, with Glu/Asp-rich carboxy-terminal domain, 2 |
| CKAP2    | - | YES | DLBCL | repression | complex    | Cytoskeleton associated protein 2                                                 |
| COPG     | - | NO  | -     | repression | complex    | Coatomer protein complex,                                                         |



|           |   |     |       |            |            |                                                                                                |
|-----------|---|-----|-------|------------|------------|------------------------------------------------------------------------------------------------|
|           |   |     |       |            |            | subunit gamma                                                                                  |
| COX7C     | - | YES | DLBCL | repression | complex    | Cytochrome c oxidase subunit VIIc                                                              |
| CRADD     | - | YES | DLBCL | activation | complex    | CASP2 and RIPK1 domain containing adaptor with death domain                                    |
| CRIPT     | r | YES | both  | repression | activation | Cysteine-rich PDZ-binding protein                                                              |
| CSNK2B    | - | NO  | -     | na         | complex    | Casein kinase 2, beta polypeptide                                                              |
| CTDSP2    | r | NO  | -     | repression | complex    | CTD (carboxy-terminal domain, RNA polymerase II, polypeptide A) small phosphatase 2            |
| CXORF42   | r | NO  | -     | na         | na         | Chromosome X open reading frame 42                                                             |
| CXXC4     | - | NO  | -     | activation | na         | CXXC finger 4                                                                                  |
| DAZAP2    | - | YES | DLBCL | activation | complex    | DAZ associated protein 2                                                                       |
| DBF4      | r | NO  | -     | repression | complex    | DBF4 homolog (S. cerevisiae)                                                                   |
| DCAKD     | r | NO  | -     | repression | na         | Dephospho-CoA kinase domain containing                                                         |
| DHTKD1    | - | NO  | -     | repression | complex    | Dehydrogenase E1 and transketolase domain containing 1                                         |
| DHX40     | - | NO  | -     | repression | complex    | DEAH (Asp-Glu-Ala-His) box polypeptide 40                                                      |
| DHX8      | - | NO  | -     | repression | na         | DEAH (Asp-Glu-Ala-His) box polypeptide 8                                                       |
| DICER1    | r | YES | DLBCL | complex    | complex    | Dicer1, Dcr-1 homolog (Drosophila)                                                             |
| DLEU1     | - | NO  | -     | na         | na         | Deleted in lymphocytic leukemia 1 (non-protein coding)                                         |
| DLEU2     | r | NO  | -     | na         | na         | Deleted in lymphocytic leukemia 2 (non-protein coding)                                         |
| DLGAP1    | r | NO  | -     | activation | activation | Discs, large (Drosophila) homolog-associated protein 1                                         |
| DUSP10    | - | NO  | -     | repression | complex    | Dual specificity phosphatase 10                                                                |
| DUSP11    | - | YES | DLBCL | repression | complex    | Dual specificity phosphatase 11 (RNA/RNP complex 1-interacting)                                |
| ECT2      | - | NO  | -     | repression | complex    | Epithelial cell transforming sequence 2 oncogene                                               |
| EFCAB2    | r | NO  | -     | repression | activation | EF-hand calcium binding domain 2                                                               |
| EIF1      | r | YES | DLBCL | activation | complex    | Eukaryotic translation initiation factor 1                                                     |
| EIF4ENIF1 | - | YES | both  | repression | complex    | Eukaryotic translation initiation factor 4E nuclear import factor 1                            |
| ELOVL6    | r | YES | DLBCL | complex    | complex    | ELOVL family member 6, elongation of long chain fatty acids (FEN1/Elo2, SUR4/Elo3-like, yeast) |

|            |   |     |           |            |            |                                                                                       |
|------------|---|-----|-----------|------------|------------|---------------------------------------------------------------------------------------|
| ERCC5      | r | YES | GC B-cell | activation | complex    | Excision repair cross-complementing rodent repair deficiency, complementation group 5 |
| ERH        | r | YES | DLBCL     | repression | activation | Enhancer of rudimentary homolog (Drosophila)                                          |
| EXO1       | - | NO  | -         | repression | complex    | Exonuclease 1                                                                         |
| FAM119B    | r | NO  | -         | activation | complex    | Family with sequence similarity 119, member B                                         |
| FAM134A    | r | YES | both      | complex    | complex    | Family with sequence similarity 134, member A                                         |
| FAM60A     | r | YES | both      | na         | complex    | Family with sequence similarity 60, member A                                          |
| FCHO1      | - | NO  | -         | repression | na         | FCH domain only 1                                                                     |
| FCHO2      | r | YES | DLBCL     | complex    | activation | FCH domain only 2                                                                     |
| FLJ13224   | r | YES | both      | na         | na         | Hypothetical protein FLJ13224                                                         |
| FLJ35776   | r | NO  | -         | na         | activation | Hypothetical protein FLJ35776                                                         |
| FLJ40330   | r | NO  | -         | na         | na         | Hypothetical FLJ40330                                                                 |
| FUZ        | r | YES | both      | activation | na         | Fuzzy homolog (Drosophila)                                                            |
| GIT1       | r | YES | DLBCL     | complex    | complex    | G protein-coupled receptor kinase interactor 1                                        |
| GORAB      | r | NO  | -         | repression | na         | Golgin, RAB6-interacting                                                              |
| GORASP1    | r | NO  | -         | complex    | complex    | Golgi reassembly stacking protein 1, 65kDa                                            |
| GPATCH3    | r | NO  | -         | activation | complex    | G patch domain containing 3                                                           |
| GPR108     | r | YES | DLBCL     | complex    | activation | G protein-coupled receptor 108                                                        |
| GTF3C2     | - | YES | DLBCL     | activation | complex    | General transcription factor IIC, polypeptide 2, beta 110kDa                          |
| GTPBP1     | - | NO  | -         | complex    | complex    | GTP binding protein 1                                                                 |
| HBP1       | - | YES | GC B-cell | activation | complex    | HMG-box transcription factor 1                                                        |
| HDAC9      | - | YES | both      | repression | complex    | Histone deacetylase 9                                                                 |
| HEXIM1     | r | YES | both      | activation | complex    | Hexamethylene bis-acetamide inducible 1                                               |
| HIST1H1E   | r | NO  | -         | repression | na         | Histone cluster 1, H1e                                                                |
| HIST1H2AJ  | r | NO  | -         | na         | na         | Histone cluster 1, H2aj                                                               |
| HIST1H2BB  | - | YES | DLBCL     | repression | na         | Histone cluster 1, H2aj                                                               |
| HIST1H2BD  | r | YES | both      | activation | complex    | Histone cluster 1, H2bd                                                               |
| HIST1H2BM  | - | YES | both      | repression | na         | Histone cluster 1, H2bm                                                               |
| HIST2H2AA3 | r | YES | both      | na         | complex    | Histone cluster 2, H2aa3                                                              |
| HIST2H2AA4 | r | YES | both      | na         | na         | Histone cluster 2, H2aa4                                                              |
| HIST2H2AB  | - | YES | both      | na         | na         | Histone cluster 2, H2ab                                                               |
| HIST2H3A   | r | YES | both      | na         | na         | Histone cluster 2, H3a                                                                |
| HIST2H3C   | r | YES | both      | na         | na         | Histone cluster 2, H3c                                                                |
| HNRNPA2B1  | r | YES | both      | complex    | activation | Histone cluster 2, H2b1                                                               |
| HOXA5      | r | NO  | -         | repression | complex    | Homeobox A5                                                                           |

|              |   |     |           |            |            |                                                                             |
|--------------|---|-----|-----------|------------|------------|-----------------------------------------------------------------------------|
| HS2ST1       | - | YES | both      | repression | complex    | Heparan sulfate 2-O-sulfotransferase 1                                      |
| HTATSF1      | r | YES | DLBCL     | repression | complex    | HIV-1 Tat specific factor 1                                                 |
| IL4I1        | r | YES | DLBCL     | repression | complex    | Interleukin 4 induced 1                                                     |
| ING3         | r | NO  | -         | repression | complex    | Inhibitor of growth family, member 3                                        |
| KBTBD3       | r | YES | DLBCL     | activation | activation | Kelch repeat and BTB (POZ) domain containing 3                              |
| KDM5C        | r | NO  | -         | complex    | na         | Lysine (K)-specific demethylase 5C                                          |
| KIAA0430     | r | YES | both      | complex    | complex    | KIAA0430                                                                    |
| KIAA0586     | r | YES | both      | repression | complex    | KIAA0586                                                                    |
| KIAA0913     | r | NO  | -         | complex    | complex    | KIAA0913                                                                    |
| KLF12        | - | NO  | -         | repression | complex    | Kruppel-like factor 12                                                      |
| KLRC2        | r | YES | DLBCL     | na         | na         | Killer cell lectin-like receptor subfamily C, member 2                      |
| LENG9        | - | YES | both      | activation | na         | Leukocyte receptor cluster (LRC) member 9                                   |
| LOC100133469 | r | NO  | -         | na         | na         | Hypothetical LOC100133469                                                   |
| LOC150381    | r | NO  | -         | na         | na         | Hypothetical LOC150381                                                      |
| LOC285074    | r | YES | DLBCL     | na         | activation | Hypothetical LOC285074                                                      |
| LOC648740    | r | NO  | -         | na         | na         | Hypothetical LOC648740                                                      |
| LRMP         | - | NO  | -         | repression | complex    | Lymphoid-restricted membrane protein                                        |
| LRP10        | r | YES | both      | complex    | complex    | Low density lipoprotein receptor-related protein 10                         |
| LTA4H        | - | YES | both      | activation | complex    | Leukotriene A4 hydrolase                                                    |
| MALAT1       | r | YES | GC B-cell | na         | activation | Metastasis associated lung adenocarcinoma transcript 1 (non-protein coding) |
| MAML3        | - | YES | GC B-cell | repression | complex    | Mastermind-like 3                                                           |
| MBD6         | - | YES | both      | complex    | complex    | Methyl-CpG binding domain protein 6                                         |
| MBOAT7       | r | NO  | -         | activation | na         | Membrane bound O-acyltransferase domain containing 7                        |
| MDM2         | r | NO  | -         | repression | complex    | Mdm2, transformed 3T3 cell double minute 2, p53 binding protein (mouse)     |
| MEPCE        | r | YES | DLBCL     | complex    | complex    | Methylphosphate capping enzyme                                              |
| METTL2A      | r | NO  | -         | na         | activation | Methyltransferase like 2A                                                   |
| MIAT         | r | NO  | -         | na         | na         | Myocardial infarction associated transcript (non-protein coding)            |
| MIR484       | r | NO  | -         | na         | na         | MicroRNA 484                                                                |
| MLL          | - | YES | both      | repression | complex    | Myeloid/lymphoid or mixed-lineage leukemia (trithorax homolog, Drosophila)  |
| MNAT1        | - | YES | DLBCL     | repression | na         | Menage a trois homolog 1, cyclin H assembly factor (Xenopus laevis)         |
| MPZL2        | r | NO  | -         | complex    | activation | Myelin protein zero-like 2                                                  |

|         |   |     |       |            |            |                                                                                                                          |
|---------|---|-----|-------|------------|------------|--------------------------------------------------------------------------------------------------------------------------|
| MPZL3   | r | NO  | -     | na         | activation | Myelin protein zero-like 3                                                                                               |
| MRPS18B | r | YES | both  | na         | complex    | Mitochondrial ribosomal protein S18B                                                                                     |
| MSH2    | - | YES | DLBCL | repression | complex    | MutS homolog 2, colon cancer, nonpolyposis type 1 (E. coli)                                                              |
| MSL2    | r | NO  | -     | activation | na         | Male-specific lethal 2-like 1 (Drosophila)                                                                               |
| MTA3    | r | NO  | -     | repression | complex    | Metastasis associated 1 family, member 3                                                                                 |
| MTMR14  | r | NO  | -     | repression | complex    | Myotubularin related protein 14                                                                                          |
| MYST3   | - | NO  | -     | activation | complex    | MYST histone acetyltransferase (monocytic leukemia) 3                                                                    |
| NAA25   | r | NO  | -     | na         | na         | N(alpha)-acetyltransferase 25, NatB auxiliary subunit                                                                    |
| NCF1B   | r | NO  | -     | na         | na         | Neutrophil cytosolic factor 1B pseudogene                                                                                |
| NDE1    | r | YES | both  | complex    | complex    | NudE nuclear distribution gene E homolog 1 (A. nidulans)                                                                 |
| NEIL1   | r | YES | both  | repression | complex    | Nei endonuclease VIII-like 1 (E. coli)                                                                                   |
| NEK9    | r | YES | DLBCL | complex    | complex    | NIMA (never in mitosis gene a)- related kinase 9                                                                         |
| NFATC4  | - | YES | both  | complex    | activation | Nuclear factor of activated T-cells, cytoplasmic, calcineurin-dependent 4                                                |
| NMI     | r | YES | DLBCL | complex    | complex    | N-myc (and STAT) interactor                                                                                              |
| NMT1    | r | NO  | -     | complex    | complex    | N-myristoyltransferase 1                                                                                                 |
| NPC1    | r | YES | both  | repression | complex    | Niemann-Pick disease, type 1                                                                                             |
| NPIPL3  | r | NO  | -     | na         | na         | Nuclear pore complex interacting protein-like 3                                                                          |
| NSL1    | r | NO  | -     | activation | complex    | NSL1, MIND kinetochore complex component, homolog (S. cerevisiae)                                                        |
| NUP37   | - | NO  | -     | repression | complex    | Nucleoporin 37kDa                                                                                                        |
| NUP62   | r | YES | DLBCL | repression | complex    | Nucleoporin 62kDa                                                                                                        |
| OGT     | - | YES | DLBCL | activation | complex    | O-linked N-acetylglucosamine (GlcNAc) transferase (UDP-N-acetylglucosamine:polypeptide-N-acetylglucosaminyl transferase) |
| OSR2    | r | NO  | -     | repression | na         | Odd-skipped related 2 (Drosophila)                                                                                       |
| OTUD5   | r | YES | DLBCL | complex    | activation | OTU domain containing 5                                                                                                  |
| PAPD4   | - | YES | DLBCL | repression | activation | PAP associated domain containing 4                                                                                       |
| PAX5    | r | YES | DLBCL | complex    | na         | Paired box 5                                                                                                             |
| PHIP    | r | NO  | -     | complex    | complex    | Pleckstrin homology domain interacting protein                                                                           |
| PIGF    | - | YES | both  | complex    | complex    | Phosphatidylinositol glycan anchor biosynthesis, class F                                                                 |
| PIH1D1  | r | NO  | -     | repression | complex    | PIH1 domain containing 1                                                                                                 |

|          |   |     |           |            |            |                                                                                              |
|----------|---|-----|-----------|------------|------------|----------------------------------------------------------------------------------------------|
| PIK3CG   | - | YES | GC B-cell | repression | complex    | Phosphoinositide-3-kinase, catalytic, gamma polypeptide                                      |
| PIK3IP1  | r | YES | both      | activation | complex    | Phosphoinositide-3-kinase interacting protein 1                                              |
| PIM1     | r | YES | both      | repression | complex    | Pim-1 oncogene                                                                               |
| PKIB     | r | YES | GC B-cell | repression | activation | Protein kinase (cAMP-dependent, catalytic) inhibitor beta                                    |
| PLEKHA8  | r | YES | both      | repression | activation | Pleckstrin homology domain containing, family A (phosphoinositide binding specific) member 8 |
| POU2AF1  | - | NO  | -         | repression | complex    | POU class 2 associating factor 1                                                             |
| PPOX     | - | NO  | -         | repression | complex    | Protoporphyrinogen oxidase                                                                   |
| PPP1R10  | r | YES | both      | activation | complex    | Protein phosphatase 1, regulatory subunit 10                                                 |
| PRDM1    | r | NO  | -         | activation | activation | PR domain containing 1, with ZNF domain                                                      |
| PRDM15   | - | YES | DLBCL     | repression | complex    | PR domain containing 15                                                                      |
| PRDM2    | r | NO  | -         | complex    | complex    | PR domain containing 2, with ZNF domain                                                      |
| PRDX5    | - | YES | GC B-cell | repression | activation | Peroxiredoxin 5                                                                              |
| PROX1    | - | YES | GC B-cell | activation | activation | Prospero homeobox 1                                                                          |
| PSIP1    | - | YES | both      | repression | complex    | PC4 and SFRS1 interacting protein 1                                                          |
| PUS1     | r | NO  | -         | activation | complex    | Pseudouridylate synthase 1                                                                   |
| PWWP2A   | r | NO  | -         | repression | activation | PWWP domain containing 2A                                                                    |
| RALGPS2  | r | YES | DLBCL     | activation | complex    | Ral GEF with PH domain and SH3 binding motif 2                                               |
| RASGEF1B | r | YES | both      | complex    | na         | RasGEF domain family, member 1B                                                              |
| RB1      | r | NO  | -         | repression | complex    | Retinoblastoma 1 (including osteosarcoma)                                                    |
| RBM22    | - | NO  | -         | repression | activation | RNA binding motif protein 22                                                                 |
| RBM34    | r | YES | both      | activation | complex    | RNA binding motif protein 34                                                                 |
| RFC1     | r | NO  | -         | repression | complex    | Replication factor C (activator 1) 1, 145kDa                                                 |
| RFTN1    | r | YES | GC B-cell | repression | complex    | Raftlin, lipid raft linker 1                                                                 |
| RIF1     | - | NO  | -         | complex    | activation | RAP1 interacting factor homolog (yeast)                                                      |
| RMND5A   | r | YES | DLBCL     | repression | complex    | Required for meiotic nuclear division 5 homolog A ( <i>S. cerevisiae</i> )                   |
| RNASEK   | r | YES | both      | activation | na         | Ribonuclease, RNase K                                                                        |
| RNF11    | r | YES | both      | activation | complex    | Ring finger protein 11                                                                       |
| RPF1     | r | NO  | -         | na         | na         | Ribosome production factor 1 homolog ( <i>S. cerevisiae</i> )                                |
| RPL4     | r | YES | DLBCL     | repression | complex    | Ribosomal protein L4                                                                         |
| RPS14    | - | NO  | -         | activation | complex    | Ribosomal protein S14                                                                        |
| RPS24    | r | NO  | -         | activation | activation | Ribosomal protein S24                                                                        |
| RPS27L   | - | NO  | -         | repression | complex    | Ribosomal protein S27-like                                                                   |
| RRM2B    | r | YES | both      | repression | activation | Ribonucleotide reductase                                                                     |

|          |   |     |           |            |            |                                                                                          |
|----------|---|-----|-----------|------------|------------|------------------------------------------------------------------------------------------|
| RRP15    | r | NO  | -         | activation | complex    | M2 B (TP53 inducible)<br>Ribosomal RNA processing<br>15 homolog ( <i>S. cerevisiae</i> ) |
| RSBN1L   | r | YES | DLBCL     | activation | activation | Round spermatid basic<br>protein 1-like                                                  |
| RSRC1    | r | NO  | -         | repression | complex    | Arginine/serine-rich coiled-<br>coil 1                                                   |
| RXRβ     | r | NO  | -         | na         | complex    | Retinoid X receptor, beta                                                                |
| SAP30L   | r | YES | both      | complex    | complex    | SAP30-like                                                                               |
| SATB1    | - | YES | both      | activation | complex    | SATB homeobox 1                                                                          |
| SC5DL    | - | YES | both      | repression | complex    | Sterol-C5-desaturase<br>(ERG3 delta-5-desaturase<br>homolog, <i>S. cerevisiae</i> )-like |
| SECISBP2 | r | NO  | -         | activation | activation | SCY1-like 1 binding<br>protein 1                                                         |
| SEP15    | r | YES | both      | na         | na         | 15 kDa selenoprotein                                                                     |
| SERINC1  | r | YES | GC B-cell | activation | complex    | Serine incorporator 1                                                                    |
| SETD7    | r | YES | both      | repression | activation | SET domain containing<br>(lysine methyltransferase) 7                                    |
| SH3BP5L  | r | NO  | -         | complex    | activation | SH3-domain GRB2-like<br>endophilin B1                                                    |
| SH3GLB1  | r | YES | DLBCL     | activation | complex    | SH3-domain GRB2-like<br>endophilin B1                                                    |
| SLC25A40 | r | NO  | -         | complex    | activation | Solute carrier family 25,<br>member 40                                                   |
| SLC39A7  | - | NO  | -         | na         | complex    | Solute carrier family 39<br>(zinc transporter), member<br>7                              |
| SLC39A9  | r | YES | DLBCL     | complex    | activation | Solute carrier family 39<br>(zinc transporter), member<br>9                              |
| SLC4A1AP | - | YES | both      | repression | activation | Solute carrier family 4<br>(anion exchanger), member<br>1, adaptor protein               |
| SMAD2    | r | NO  | -         | repression | complex    | SMAD family member 2                                                                     |
| SPAST    | r | YES | DLBCL     | activation | complex    | Spastin                                                                                  |
| SRP54    | r | NO  | -         | repression | complex    | Signal recognition particle<br>54kDa                                                     |
| STAT6    | - | YES | GC B-cell | complex    | complex    | Signal transducer and<br>activator of transcription 6,<br>interleukin-4 induced          |
| STK11IP  | - | YES | both      | repression | na         | Serine/threonine kinase 11<br>interacting protein                                        |
| STK35    | - | YES | DLBCL     | complex    | activation | Serine/threonine kinase 35                                                               |
| SUPT7L   | r | YES | both      | repression | complex    | Suppressor of Ty 7 ( <i>S.</i><br><i>cerevisiae</i> )-like                               |
| TAGLN2   | r | NO  | -         | activation | complex    | Transgelin 2                                                                             |
| TATDN3   | r | NO  | -         | activation | activation | TatD DNase domain<br>containing 3                                                        |
| TBC1D15  | - | YES | GC B-cell | activation | complex    | TBC1 domain family,<br>member 15                                                         |
| TBC1D17  | r | YES | both      | activation | na         | TBC1 domain family,<br>member 17                                                         |
| TBL1XR1  | r | YES | both      | complex    | activation | Transducin (beta)-like 1 X-<br>linked receptor 1                                         |
| TCF7L2   | - | NO  | -         | complex    | complex    | Transcription factor 7-like 2<br>(T-cell specific, HMG-box)                              |
| TEAD2    | r | NO  | -         | activation | na         | TEA domain family<br>member 2                                                            |

|          |   |     |       |            |            |                                                                    |
|----------|---|-----|-------|------------|------------|--------------------------------------------------------------------|
| TESK2    | r | NO  | -     | complex    | na         | Testis-specific kinase 2                                           |
| TIMM9    | - | YES | both  | complex    | complex    | Translocase of inner mitochondrial membrane 9 homolog (yeast)      |
| TK2      | - | YES | DLBCL | complex    | complex    | Thymidine kinase 2, mitochondrial                                  |
| TLR1     | - | YES | both  | activation | complex    | Toll-like receptor 1                                               |
| TMEM126A | r | NO  | -     | repression | activation | Transmembrane protein 126                                          |
| TMEM140  | r | YES | both  | activation | complex    | Transmembrane protein 140                                          |
| TMEM167A | r | NO  | -     | repression | na         | Transmembrane protein 167A                                         |
| TMEM167B | r | YES | DLBCL | activation | na         | Transmembrane protein 167B                                         |
| TMX4     | r | NO  | -     | activation | na         | Thioredoxin-related transmembrane protein 4                        |
| TOP2B    | r | YES | both  | repression | complex    | Topoisomerase (DNA) II beta 180kDa                                 |
| TP53     | r | YES | both  | repression | complex    | Tumor protein p53                                                  |
| TPP2     | - | YES | both  | complex    | complex    | Tripeptidyl peptidase II                                           |
| TRDMT1   | r | NO  | -     | complex    | complex    | tRNA aspartic acid methyltransferase 1                             |
| TRIB1    | r | NO  | -     | activation | complex    | Tribbles homolog 1 (Drosophila)                                    |
| TRIM23   | r | YES | both  | activation | complex    | Tripartite motif containing 23                                     |
| TRMT112  | r | NO  | -     | repression | na         | tRNA methyltransferase 11-2 homolog (S. cerevisiae)                |
| TSEN34   | r | NO  | -     | activation | complex    | tRNA splicing endonuclease 34 homolog (S. cerevisiae)              |
| TSFM     | - | NO  | -     | repression | complex    | Ts translation elongation factor, mitochondrial                    |
| TTC21A   | r | NO  | -     | complex    | na         | Tetratricopeptide repeat domain 21A                                |
| TXNDC15  | r | NO  | -     | repression | na         | Thioredoxin domain containing 15                                   |
| TXNIP    | - | YES | both  | activation | complex    | Thioredoxin interacting protein                                    |
| UBE2B    | r | YES | DLBCL | repression | complex    | Ubiquitin-conjugating enzyme E2B                                   |
| UBE2S    | - | YES | DLBCL | na         | complex    | Ubiquitin-conjugating enzyme E2S                                   |
| UBE3C    | r | NO  | -     | repression | complex    | Ubiquitin protein ligase E3C                                       |
| UBL7     | r | YES | DLBCL | repression | activation | Ubiquitin-like 7 (bone marrow stromal cell-derived)                |
| UBXN8    | r | NO  | -     | activation | na         | UBX domain protein 8                                               |
| USP21    | r | NO  | -     | activation | na         | Ubiquitin specific peptidase 21                                    |
| VCPIP1   | r | YES | both  | repression | na         | Valosin containing protein (p97)/p47 complex interacting protein 1 |
| VNN2     | - | NO  | -     | repression | complex    | Vanin 2                                                            |
| VPREB3   | - | NO  | -     | repression | complex    | Pre-B lymphocyte gene 3                                            |
| VPS4B    | - | YES | both  | activation | complex    | Vacuolar protein sorting 4                                         |

|         |   |     |       |            |            |                                                                        |
|---------|---|-----|-------|------------|------------|------------------------------------------------------------------------|
| WARS2   | - | YES | both  | repression | activation | homolog B ( <i>S. cerevisiae</i> )                                     |
| WASF2   | - | YES | DLBCL | complex    | activation | Tryptophanyl tRNA synthetase 2, mitochondrial                          |
| WDR48   | r | NO  | -     | activation | complex    | WAS protein family, member 2                                           |
| WDR83   | r | NO  | -     | na         | na         | WD repeat domain 48                                                    |
| WRAP53  | r | NO  | -     | repression | na         | WD repeat domain 8                                                     |
| XPO7    | r | NO  | -     | repression | complex    | WD repeat containing, antisense to TP53                                |
| XRCC4   | - | NO  | -     | repression | complex    | exportin 7                                                             |
| YIPF4   | r | YES | both  | repression | complex    | X-ray repair complementing defective repair in Chinese hamster cells 4 |
| ZBTB5   | - | NO  | -     | complex    | complex    | Yip1 domain family, member 4                                           |
| ZCCHC7  | - | NO  | -     | repression | activation | Zinc finger, CCHC domain containing 5                                  |
| ZCWPW1  | - | YES | DLBCL | activation | na         | Zinc finger, CCHC domain containing 7                                  |
| ZFP106  | r | YES | both  | repression | complex    | Zinc finger, CW type with PWWP domain 1                                |
| ZFP36L1 | - | YES | both  | activation | complex    | Zinc finger protein 106 homolog (mouse)                                |
| ZNF250  | r | NO  | -     | activation | na         | Zinc finger protein 36, C3H type-like 1                                |
| ZNF585B | - | NO  | -     | na         | na         | Zinc finger protein 250                                                |
| ZNF687  | r | YES | both  | repression | na         | Zinc finger protein 585B                                               |
| ZSCAN18 | r | NO  | -     | activation | complex    | Zinc finger protein 687                                                |
| ZWILCH  | r | YES | DLBCL | repression | activation | Zinc finger and SCAN domain containing 18                              |
|         |   |     |       |            |            | Zwilch, kinetochore associated, homolog ( <i>Drosophila</i> )          |

---

*r: computationally rescued following the criteria specified in methods; both: bound to the corresponding promoter in both GC B-cells and DLBCL cells; na: non-available expression data from naïve-GC-memory cells (Fig. 2).*



**SUPPLEMENTARY TABLE S2. Selected significant BioFunctions identified by IPA analysis of FOXP1 target genes in the OCI-Ly1 cell line**

**Overall IPA analysis**

| Category                                      | Functions Annotation           | p-Value  | Key Targets                                                                                                                                                                                                                                                                                                                                                                                                                                            | # Molecules |
|-----------------------------------------------|--------------------------------|----------|--------------------------------------------------------------------------------------------------------------------------------------------------------------------------------------------------------------------------------------------------------------------------------------------------------------------------------------------------------------------------------------------------------------------------------------------------------|-------------|
| Gene Expression                               | expression of RNA              | 9.30E-07 | ATF5, ATF6, BCLAF1, BTG1, CBX3, CFLAR, CIRH1A, CITED2, CKAP2, CTDSP2, DICER1, ECT2, EIF1, GTF3C2, HBP1, HDAC9, HEXIM1, HIST2H3C (includes others), HNRNPA2B1, HOXA5, HTATSF1, KAT6A, KDM5C, KLF12, MAML3, MDM2, MLL, MNAT1, MSH2, NFATC4, NMI, NUP62, OGT, OSR2, PAX5, PHIP, POU2AF1, PRDM1, PRDM2, PROX1, PSIP1, PUS1, RB1, RFC1, RNASEK, RNF11, RPS14, RPS24, RPS27L, RXRB, SATB1, SMAD2, STAT6, TBL1XR1, TCF7L2, TEAD2, TP53, TXNIP, USP21, ZFP36L1 | 60          |
| Cancer                                        | diffuse B-cell lymphoma        | 2.16E-06 | BTG1, CFLAR, MDM2, PAX5, PIM1, PRDM1, PRDM2, TP53                                                                                                                                                                                                                                                                                                                                                                                                      | 8           |
| DNA Replication, Recombination, and Repair    | checkpoint control             | 3.87E-06 | BUB3, DBF4, EXO1, MDM2, MSH2, PIM1, RB1, TP53, ZWILCH                                                                                                                                                                                                                                                                                                                                                                                                  | 9           |
| Cancer                                        | Lympho-hematopoietic cancer    | 1.04E-05 | BCLAF1, BTG1, CD55, CFLAR, DICER1, DLEU1, DLEU2, EXO1, GIT1, HDAC9, KAT6A, MDM2, MLL, MSH2, PAX5, PIM1, PRDM1, PRDM2, PSIP1, RB1, RPL4, RPS14, RRM2B, RXRB, SATB1, SRP54, STAT6, TOP2B, TP53, TRIB1, XRCC4                                                                                                                                                                                                                                             | 31          |
| Hematological System Development and Function | differentiation of leukocytes  | 2.84E-04 | BIK, CITED2, DICER1, HDAC9, HOXA5, KAT6A, MLL, MPZL2, MSH2, OGT, PAX5, PIK3CG, POU2AF1, PRDM1, RB1, RFTN1, SATB1, SMAD2, STAT6, TLR1, TP53, XRCC4                                                                                                                                                                                                                                                                                                      | 22          |
| Infectious Disease                            | Viral Infection                | 3.71E-04 | AMY2B, APBB1IP, BCLAF1, CBLL1, CD55, CEP68, CHMP2B, COPG1, CSNK2B, DAZAP2, DICER1, DLGAP1, ERCC5, FCHO2, GORASP1, HIST1H2BD, HIST2H2AA3/HIST2H2AA4, HTATSF1, KAT6A, KLRC2, LTA4H, MDM2, MSH2, NDE1, NEK9, NMT1, NUP62, OGT, PRDM2, PSIP1, RPS14, SMAD2, SPAST, STAT6, TAGLN2, TOP2B, TP53, TXNIP, UBE2B, UBE3C, VNN2, VPS4B, WASF2, WDR83                                                                                                              | 44          |
| Cellular Development                          | differentiation of blood cells | 4.85E-04 | BIK, CITED2, DICER1, HDAC9, HOXA5, KAT6A, MLL, MPZL2, MSH2, OGT, PAX5, PIK3CG, POU2AF1, PRDM1, RB1, RFTN1, RPS14, SATB1, SMAD2, STAT6, TLR1, TP53, WASF2, XRCC4                                                                                                                                                                                                                                                                                        | 24          |
| Humoral Immune Response                       | class switching                | 7.77E-04 | CD37, EXO1, MSH2, PRDM1, STAT6, XRCC4                                                                                                                                                                                                                                                                                                                                                                                                                  | 6           |

**IPA analysis on the FOXP1/BCL6 overlapping target genes**

| Category        | Functions Annotation                  | p-Value  | Key Targets                                                                                                                                                                           | # Molecules |
|-----------------|---------------------------------------|----------|---------------------------------------------------------------------------------------------------------------------------------------------------------------------------------------|-------------|
| Gene Expression | activation of DNA endogenous promoter | 1.05E-06 | ATF5, ATF6, CITED2, CKAP2, DICER1, GTF3C2, HDAC9, HEXIM1, HIST2H3C (includes others), HTATSF1, MAML3, MLL, MNAT1, NFATC4, NMI, PAX5, PROX1, PSIP1, SATB1, STAT6, TBL1XR1, TP53, TXNIP | 23          |
| Cell Cycle      | aneuploidy                            | 3.53E-05 | BUB3, PIM1, TP53, TPP2, UBE2B                                                                                                                                                         | 5           |

|                                            |                               |          |                                                                                                                                                                                                                                                                                                                                               |    |
|--------------------------------------------|-------------------------------|----------|-----------------------------------------------------------------------------------------------------------------------------------------------------------------------------------------------------------------------------------------------------------------------------------------------------------------------------------------------|----|
| Cellular Assembly and Organization         | formation of mitotic spindle  | 3.53E-05 | CKAP2, DICER1, NDE1, NEK9, TP53                                                                                                                                                                                                                                                                                                               | 5  |
| Cell Cycle                                 | checkpoint control            | 3.31E-04 | BUB3, MSH2, PIM1, TP53, ZWILCH                                                                                                                                                                                                                                                                                                                | 5  |
| Infectious Disease                         | Viral Infection               | 4.56E-04 | CBLL1, CD55, CHMP2B, DAZAP2, DICER1, ERCC5, FCHO2, HIST1H2BD, HIST2H2AA3/HIST2H2AA4, HTATSF1, KLRC2, LTA4H, MSH2, NDE1, NEK9, NUP62, OGT, PSIP1, SPAST, STAT6, TOP2B, TP53, TXNIP, UBE2B, VPS4B, WASF2                                                                                                                                        | 26 |
| Hematological Disease                      | hematologic cancer            | 1.18E-03 | CD55, GIT1, HDAC9, MLL, MSH2, PAX5, PSIP1, RRM2B, SATB1, STAT6, TOP2B, TP53                                                                                                                                                                                                                                                                   | 12 |
| Hematopoiesis                              | differentiation of leukocytes | 1.20E-03 | CITED2, DICER1, HDAC9, MLL, MSH2, OGT, PAX5, PIK3CG, RFTN1, SATB1, STAT6, TLR1, TP53                                                                                                                                                                                                                                                          | 13 |
| Cancer                                     | Cancer                        | 1.79E-03 | AIDA, AKT1S1, ATF5, CBX3, CD55, CIRH1A, DICER1, EIF1, ELOVL6, ERCC5, GIT1, HBP1, HDAC9, HIST1H2BD, HIST2H2AA3/HIST2H2AA4, LRP10, MALAT1, MBD6, MLL, MSH2, NDE1, NEIL1, NEK9, NPC1, NUP62, PAX5, PIK3CG, PIK3IP1, PIM1, PLEKHA8, PRDX5, PROX1, PSIP1, RPL4, RRM2B, SATB1, STAT6, STK35, TOP2B, TP53, TRIM23, TXNIP, UBE2B, UBE2S, WARS2, YIPF4 | 46 |
| Cellular Growth and Proliferation          | proliferation of cells        | 3.39E-03 | AKT1S1, ATF5, ATF6, BUB3, CBLL1, CD37, CD55, CITED2, CRADD, DICER1, EIF1, GIT1, HBP1, HEXIM1, HNRNPA2B1, IL4I1, MAML3, MLL, MNAT1, NDE1, NEIL1, NFATC4, NUP62, OGT, PAX5, PIGF, PIK3CG, PIK3IP1, PIM1, PROX1, RRM2B, SATB1, SETD7, SPAST, STAT6, TP53, TPP2, TXNIP, UBE2B, WASF2, ZFP36L1                                                     | 41 |
| Cell Cycle                                 | cell cycle progression        | 3.68E-03 | BUB3, CKAP2, DICER1, HBP1, MLL, MSH2, NDE1, NEK9, PIM1, PROX1, SETD7, STAT6, TOP2B, TP53, TPP2, UBE2S, VCPIP1                                                                                                                                                                                                                                 | 17 |
| Cell Death and Survival                    | apoptosis                     | 3.69E-03 | AKT1S1, ATF5, ATF6, CD55, CITED2, CKAP2, CRADD, DICER1, ERCC5, HEXIM1, MLL, MNAT1, MSH2, NFATC4, NPC1, NUP62, OGT, PAX5, PIK3CG, PIK3IP1, PIM1, PRDX5, RRM2B, SATB1, SEP15, SH3GLB1, STAT6, TLR1, TP53, TPP2, TXNIP, UBE2B, ZFP36L1                                                                                                           | 33 |
| DNA Replication, Recombination, and Repair | repair of DNA                 | 7.19E-03 | ERCC5, MSH2, NEIL1, RRM2B, TP53, UBE2B                                                                                                                                                                                                                                                                                                        | 6  |
| Cellular Function and Maintenance          | autophagy                     | 1.22E-02 | ATF6, DICER1, NPC1, SH3GLB1, TLR1, TP53                                                                                                                                                                                                                                                                                                       | 6  |

**SUPPLEMENTARY TABLE S3. List of primers, siRNAs and antibodies**

**Q-ChIP**

|         | <b>FORWARD</b>        | <b>REVERSE</b>        |
|---------|-----------------------|-----------------------|
| DICER   | GAATTCGACTGCCTCCATTG  | AGCTAAGCTCTCCGGGAAAC  |
| PRR20A  | CTCCAGCAGTCGGCTTTC    | GGAGGTGTCCACAGGTTAC   |
| PAX5    | CCTAGGGGGAAGAGCCTAGAG | GATTGTGGCGAAATCTGCTC  |
| PIM1    | TCCCACCCTCGTTTTAGATG  | GAGGAAATCACGAAGCAAATG |
| POU2AF1 | CTCAACTGGGAGGAAACACC  | AGGGGAGGGGCTACTGTG    |
| PRDM1   | CGAAGAGTACAAGAGCGATGG | ACAAGGCTGGGTGAATTCTG  |

**QRT-PCR**

|                    | <b>FORWARD</b>          | <b>REVERSE</b>         |
|--------------------|-------------------------|------------------------|
| BCL6               | AGCCACAAGACCGTCCATAC    | CGAGTGTGGGTTTTTCAGGTT  |
| DICER              | GCTGAAACTGCAACTGACC     | TCTTTCATAAAGCCCACTTCTG |
| PRDM1              | CTACCCTTATCCCGGAGAGC    | GCTCGGTTGCTTTAGACTGC   |
| hGAPDH             | ACTTTGTCAAGCTCATTTC     | CACAGGGTACTTTATTGATG   |
| mGAPDH             | ACTTTGTCAAGCTCATTTC     | TGCAGCGAACTTTATTGATG   |
| hFOXP1<br>(Fig. 1) | CAGATATTGCGCAGAACCAAG   | AAGCAAACATTCGTGTGAACC  |
| hFOXP1<br>(Fig. 3) | GGCAACTTAGCCAGCGCAATA   | GCATAGGAGATCTGCCTGGA   |
| mFOXP1             | AGGCTGTGAGGCGGTTTGT     | CATTGAGCTGTGCTTCTATCG  |
| PAX5               | ATGTTTGCCTGGGAGATCAG    | GGGTGGCTGCTGTACTTTTG   |
| PIM1               | GCTCGGTCTACTCAGGCATC    | AGTGCCATTAGGCAGCTCTC   |
| POU2AF1            | CTATGCCTCTCCGCCACTC     | CCACGGGAAATAGGTGAGG    |
| $\gamma$ 1 GLT     | TCGAGAAGCCTGAGGAATGT    | ATAGACAGATGGGGGTGTCG   |
| $\gamma$ 3 GLT     | AGAGTCAGCCTCAAGGAGATGAT | CAGGGACCAAGGGATAGACAG  |
| Ig $\beta$         | GCTCAGAGACAGAGCAGTGACC  | AGATCTGGGAACAAGGGCTTC  |

**Genotyping PCR for the presence of the human FOXP1 transgene**

|        | <b>FORWARD</b>                 | <b>REVERSE</b>                 |
|--------|--------------------------------|--------------------------------|
| hFOXP1 | AACAGCAACGAGAGTGACAGCAGT<br>CC | AGCCACCACCTTCTGATAGGCAGC<br>CC |

**Southern blot**

|        | <b>FORWARD</b>           | <b>REVERSE</b>         |
|--------|--------------------------|------------------------|
| hFOXP1 | GACTTTTGCAGGCTCCACCAGACC | AGCAAGCAGGGTCAGGCAAAGC |

**siRNA knockdown**

|        | <b>siRNA1</b>       | <b>siRNA2</b>        |
|--------|---------------------|----------------------|
| hFOXP1 | CAACTTAGCCAGCGCAATA | GCCAAGGCCTTCTGACAATT |

**Antibodies**

|           | <b>REFERENCE</b> | <b>USE</b>  |
|-----------|------------------|-------------|
| h/m actin | Calbiochem       | WB (1:5000) |

|                      |                                               |                                       |
|----------------------|-----------------------------------------------|---------------------------------------|
| h BCL6               | Dako                                          | WB (1:500), IHC (1:10), IF (1:10)     |
| h CD3                | Dako                                          | IHC (1:100)                           |
| h CD79 $\alpha$      | Dako                                          | IHC (1:40)                            |
| h CD21               | Dako                                          | IHC (1:50)                            |
| m CD21               | Abcam                                         | IHC (1:50)                            |
| h CD68               | Dako                                          | IHC (1:50)                            |
| h IgD                | Dako                                          | IHC (1:50)                            |
| h/m FOXP1            | Abcam (polyclonal ab16645;<br>Lot: GR55101-1) | WB (1:5000), IHC (1:1000), IF (1:200) |
| PNA                  | Vector Laboratories                           | IHC (1:1000)                          |
| h/m $\beta$ -tubulin | Sigma                                         | WB (1:3000)                           |

## SUPPLEMENTARY FIGURE LEGENDS

**Supplementary Figure S1.** FOXP1 expression in the OCI-Ly1 cell line. (A) Western blotting with anti-FOXP1 polyclonal antibody in a panel of GC-like DLBCL cell lines shows the predominance of the longer isoform in the OCI-Ly1 cells, while the RCK8 cells exhibit very low levels of FOXP1 expression. (B) Bar graph representing DNA microarray data (average signal of the probes  $\pm$  SEM), depicting the expression intensity in OCI-Ly1 and RCK8 cells of the four FOXP family members 1-2-3-4 (GEO series GSE42203). Consistent with previous protein analysis, significant high-levels of *FOXP1* mRNA expression are demonstrated only in the OCI-Ly1 cell line, and not in RCK8 cells. (C) Q-ChIP analyses with anti-FOXP1 polyclonal antibody confirm FOXP1 occupancy at POU2AF1 target gene and not at PRR20A negative control in OCI-Ly1 FOXP1-positive cells. The absence of cross reactivity with other expressed FOXP family members is confirmed in RCK8 FOXP1-negative cells. Data are displayed as average fold enrichment relative to the input in replicated experiments.

**Supplementary Figure S2.** Expression of FOXP1 target genes in human DLBCL samples. (A) Graphical heat map representation of the transcript abundance of FOXP1 target genes identified by ChIP-on-chip in the DLBCL cell line OCI-Ly1. The data are derived from previously published expression arrays<sup>42</sup>, consisting of tumor specimens from DLBCL patients classified either as GC-, ABC- or Type3-subtype. Red and green indicate high and low abundance, respectively. After sorting the samples (columns) based on FOXP1 expression levels (in a row at the bottom), around 75% of the targets exhibited a complex interrelationship with FOXP1, while 25% of targets clustered in a group that exhibited a positive association with FOXP1 expression in all DLBCL subtypes. (B) Expression centroid views evaluating the variability of gene expression inside each cluster. The bottom cluster of genes positively associates with increasing levels of FOXP1 in all DLBCL subtypes.

# Supplementary Figure S1

**A**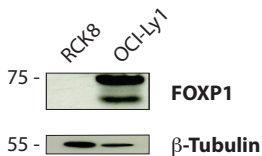**B**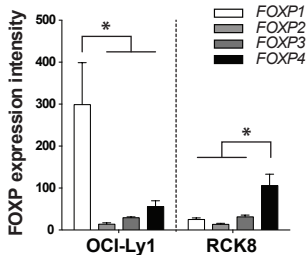**C**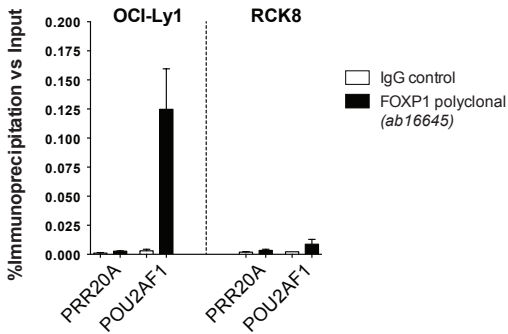

# Supplementary Figure S2

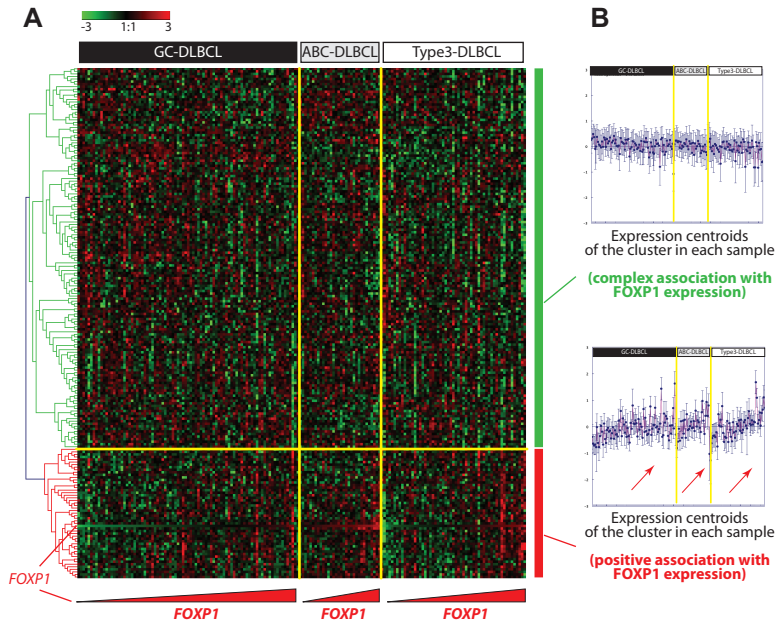

Supplement: supp_blood-2012-10-462846_Document1.pdf [file supp_blood-2012-10-462846_Document1.pdf]
